# Supplementary material for: What Factors Are Associated with Attitudes towards HPV Vaccination among Kazakhstani Women? Exploratory Analysis of Cross-Sectional Survey Data
Source: MDPI journal article supplement (doi:10.3390/vaccines10050824), 2022-05-23
Supplement: s1 [file s1]

## HPV vaccine questionnaire

### Part 1

1. How old are you? \_\_\_\_\_
2. What is the highest degree of education you've received?
  - ☐ Elementary (1-4 classes)
  - ☐ Middle school (5-9 classes)
  - ☐ High school (10-11 classes)
  - ☐ Secondary technical or vocational
  - ☐ University degree (bachelors)
  - ☐ Master, Ph.D.
3. Your nationality
  - ☐ Kazakh
  - ☐ Russian
  - ☐ Other \_\_\_\_\_
4. Where do you live?
  - ☐ Nur-Sultan
  - ☐ Almaty
  - ☐ Aktobe
  - ☐ Oskemen
  - ☐ Pavlodar
  - ☐ Other \_\_\_\_\_
5. Your relationship status?
  - ☐ Single
  - ☐ Married
  - ☐ Cohabiting with a partner/constant partner
  - ☐ Divorced
  - ☐ Widowed
  - ☐ Other \_\_\_\_\_
6. How many children do you have \_\_\_\_\_
7. How many female children do you have \_\_\_\_\_  
How many male children do you have \_\_\_\_\_
8. How old are your children \_\_\_\_\_
9. What is your monthly family income (tenge)?
  - ☐ ≤ 100 000
  - ☐ 101 000 - 200 000
  - ☐ 201 000 – 300 000
  - ☐ 301 000 – 400 000
  - ☐ ≥ 401 000

### CONTEXTUAL FACTORS

1. Have you ever heard about the HPV vaccine?
  - a. Yes
  - b. No
2. If you answered yes, which sources of information did you rely on to get information about the HPV vaccine?
  - a. from the attending physician
  - b. from a pediatrician
  - c. from a gynecologist
  - d. Television
  - e. Social networks
  - f. Written press
  - g. Family
  - h. Friends
  - i. School
  - j. Other
- 3.

|    | Please rate to which extent you agree with following statements                                                                                           | Completely disagree | Somewhat disagree | Neutral | Somewhat agree | Completely agree |
|----|-----------------------------------------------------------------------------------------------------------------------------------------------------------|---------------------|-------------------|---------|----------------|------------------|
| 1. | Because of the controversy surrounding the COVID-19 vaccine, I have less confidence in HPV vaccination recommendations.                                   | 1                   | 2                 | 3       | 4              | 5                |
| 2. | Since the HPV vaccination program launched in Kazakhstan in 2013 has led to complications in some cases, I have less confidence in the healthcare system. | 1                   | 2                 | 3       | 4              | 5                |

|    |                                                                                                                                                                      |   |   |   |   |   |
|----|----------------------------------------------------------------------------------------------------------------------------------------------------------------------|---|---|---|---|---|
| 3. | I think vaccinating teenage girls against HPV encourages them to have sex                                                                                            | 1 | 2 | 3 | 4 | 5 |
| 4. | It's hard to talk to my daughter about her sexual health<br>Skip the question if you don't have a daughter/daughters                                                 | 1 | 2 | 3 | 4 | 5 |
| 5. | I am uncomfortable discussing my daughter's sexual health with a doctor or other healthcare professional<br>Skip the question if you don't have a daughter/daughters | 1 | 2 | 3 | 4 | 5 |
| 6. | I am having difficulty bringing up the subject of the HPV vaccine with my daughter<br>Skip the question if you don't have a daughter/daughters                       | 1 | 2 | 3 | 4 | 5 |
| 7. | I am in favor of the compulsory vaccines for children approved by the government of Kazakhstan                                                                       | 1 | 2 | 3 | 4 | 5 |
| 8. | Everyone should be able to decide which vaccines are needed for their children                                                                                       | 1 | 2 | 3 | 4 | 5 |

4. I happened to refuse a vaccine for my daughter (or choose not to give her a vaccine) **Skip the question if you don't have a daughter/daughters**
  - a. Yes
  - b. No
5. I happened to refuse a vaccine for myself
  - a. Yes
  - b. No
6. I know someone who got seriously ill after getting vaccinated
  - a. Yes
  - b. No
7. I know a person who became seriously ill because they were not vaccinated
  - a. Yes
  - b. No
8. Personally, I have already had abnormal cervico-vaginal smears for which treatment was necessary (conization / surgery)
  - a. Yes
  - b. No
9. Alternative medicines strengthen the body's defenses, thus leading to a complete cure (please rate to which extent you agree with the statement from 1-least to 5-most)
 

|   |   |   |   |   |
|---|---|---|---|---|
| 1 | 2 | 3 | 4 | 5 |
|---|---|---|---|---|
10. I prefer my daughter to naturally develop defenses against papillomavirus infections rather than through vaccination (please rate to which extent you agree with the statement from 1-least to 5-most). **Skip the question if you don't have a daughter/daughters**

|   |   |   |   |   |
|---|---|---|---|---|
| 1 | 2 | 3 | 4 | 5 |
|---|---|---|---|---|
11. Have you ever searched for information about the HPV vaccine in the past?
  - a. Yes
  - b. No
12. (If has already looked for information) Name the 3 most consulted sources of information
  - a. Attending physician
  - b. Other health professional
  - c. Internet
  - d. Family
  - e. Books
  - f. Written press
  - g. Other
13. (If used the internet) How did you use the internet?
  - a. I consulted forums

- b. I consulted blogs
  - c. I consulted social networks
  - d. I consulted information sites
  - e. Other
14. (If has consulted information sites) Which site? \_\_\_\_\_
15. (If has already researched information) After having had all this information, were you able to make a decision regarding the HPV vaccination?
- a. Yes, easily
  - b. Yes, with difficulty
  - c. No, not really
  - d. Not at all
16. Papillomavirus infections are very rare
- a. True
  - b. False
  - c. Don't know
17. Men cannot get papillomavirus infection
- a. True
  - b. False
  - c. Don't know
18. A person can be infected with HPV for many years without knowing it
- a. True
  - b. False
  - c. Don't know
19. HPV can be transmitted through oral sex
- a. True
  - b. False
  - c. Don't know
20. HPV vaccine protects against all sexually transmitted infections
- a. True
  - b. False
  - c. Don't know
21. HPV vaccine protects against genital warts
- a. True
  - b. False
  - c. Don't know
22. HPV vaccines are most effective when given to people who have never had sex
- a. True
  - b. False
  - c. Don't know
23. A person who has been vaccinated against HPV can still develop cervical cancer
- a. True
  - b. False
  - c. Don't know
24. Girls who have been vaccinated against papillomaviruses need Papillomavirus Pap smears when they are older
- a. True
  - b. False
  - c. Don't know
25. HPV vaccine helps cure HPV infection
- a. True
  - b. False
  - c. Don't know
26. Having sex at a young age increases your chances of getting HPV infection
- a. True
  - b. False
  - c. Don't know
27. Papillomavirus infections can cause throat cancer
- a. True
  - b. False
  - c. Don't know
28. Please rate the extent to which you trust the following sources to tell the truth about vaccines

|                            | Completely distrust | Somewhat distrust | Neutral | Somewhat trust | Completely trust |
|----------------------------|---------------------|-------------------|---------|----------------|------------------|
| Pharmaceutical industry    | 1                   | 2                 | 3       | 4              | 5                |
| government                 | 1                   | 2                 | 3       | 4              | 5                |
| your attending physician   | 1                   | 2                 | 3       | 4              | 5                |
| physicians in general      | 1                   | 2                 | 3       | 4              | 5                |
| pharmacists                | 1                   | 2                 | 3       | 4              | 5                |
| other health professionals | 1                   | 2                 | 3       | 4              | 5                |
| scientific researchers     | 1                   | 2                 | 3       | 4              | 5                |
| traditional media          | 1                   | 2                 | 3       | 4              | 5                |
| alternative media          | 1                   | 2                 | 3       | 4              | 5                |

29.

|     | Please rate to which extent you agree with following statements                                                                                                                               | Completely disagree | Somewhat disagree | Neutral | Somewhat agree | Completely agree |
|-----|-----------------------------------------------------------------------------------------------------------------------------------------------------------------------------------------------|---------------------|-------------------|---------|----------------|------------------|
| 1.  | HPV vaccine may be responsible for long-term health problems                                                                                                                                  | 1                   | 2                 | 3       | 4              | 5                |
| 2.  | There hasn't been enough research done on the HPV vaccine                                                                                                                                     | 1                   | 2                 | 3       | 4              | 5                |
| 3.  | HPV vaccines are not safe                                                                                                                                                                     | 1                   | 2                 | 3       | 4              | 5                |
| 4.  | HPV vaccine is effective in preventing HPV infections                                                                                                                                         | 1                   | 2                 | 3       | 4              | 5                |
| 5.  | HPV vaccine is effective in preventing genital warts                                                                                                                                          | 1                   | 2                 | 3       | 4              | 5                |
| 6.  | Getting my daughter vaccinated against HPV will help protect her against sexually transmitted infections<br><b>Skip the question if you don't have a daughter/daughters</b>                   | 1                   | 2                 | 3       | 4              | 5                |
| 7.  | HPV vaccine is effective in preventing cancers associated with HPV                                                                                                                            | 1                   | 2                 | 3       | 4              | 5                |
| 8.  | Using a condom prevents transmission of papillomavirus infections                                                                                                                             | 1                   | 2                 | 3       | 4              | 5                |
| 9.  | Pap smear helps prevent cervical cancer                                                                                                                                                       | 1                   | 2                 | 3       | 4              | 5                |
| 10. | Most of my friends get their daughters vaccinated against HPV                                                                                                                                 | 1                   | 2                 | 3       | 4              | 5                |
| 11. | Doctors / healthcare professionals think it's a good idea to get my daughter vaccinated against HPV<br><b>Skip the question if you don't have a daughter/daughters</b>                        | 1                   | 2                 | 3       | 4              | 5                |
| 12. | HPV vaccine too new to know if it's safe and reliable                                                                                                                                         | 1                   | 2                 | 3       | 4              | 5                |
| 13. | It would be easier to vaccinate my daughter if the doctor had vaccines in his office to vaccinate my daughter the same day<br><b>Skip the question if you don't have a daughter/daughters</b> | 1                   | 2                 | 3       | 4              | 5                |
| 14. | If the HPV vaccine was important, it would have been made mandatory                                                                                                                           | 1                   | 2                 | 3       | 4              | 5                |
| 15. | I think my daughter is too young to be vaccinated against HPV<br><b>Skip the question if you don't have a daughter/daughters</b>                                                              | 1                   | 2                 | 3       | 4              | 5                |
| 16. | HPV vaccine was not made mandatory because it is risky                                                                                                                                        | 1                   | 2                 | 3       | 4              | 5                |
